# Supplementary material
Source: MDPI journal article supplement (https://www.mdpi.com/2227-9709/6/3/41)
Supplement: s1 [file s1]

## Sheet: Misterm
Misterm: Original	ST2	ERR	CORR	Critical_word_err	Critical_word_corr
Most datasets in the database have a link to metadata information which you can consult to find more background information regarding a specific dataset, look for this icon Metadata icon attached to a data folder or an individual dataset.	In the data folder, most datasets have a link to metadata information, which you can consult at all times.	Die meisten Datensätze sind mit Metadaten verknüpft, die Sie in der entsprechenden Datendatei jederzeit einsehen können.	Die meisten Datensätze sind mit Metadaten verknüpft, die Sie im entsprechenden Dateiordner jederzeit einsehen können.	Datendatei	Dateiordner
Commercial Drone operations require a significant volume to become profitable in the long term	Commercial Drone operations require a significant volume to become profitable in the long term.	Der kommerzielle Einsatz von Handelsdampf kann nur bei einem beträchtlichen Marktvolumen langfristig rentabel werden.	Der kommerzielle Einsatz von Drohnen kann nur bei einem beträchtlichen Marktvolumen langfristig rentabel werden.	Handelsdampf	Drohnen
I am also glad that he agreed to continue to advise me, after 1 April, as Special Adviser on strategic issues on the EU’s agenda, in particular the Multiannual Financial Framework and Brexit Preparedness."	I am also glad that he agreed to continue to advise me on Brexit Preparedness as Sepcial Adviser.	Ich freue mich auch, dass er sich bereit erklärt hat, mir weiterhin als Sonderberater zum Brexit Bereitschaftsplan zur Seite zu stehen.	Ich freue mich auch, dass er sich bereit erklärt hat, mir weiterhin als Sonderberater zu den Vorbereitungen auf den Brexit zur Seite zu stehen.	Bereitschaftsplan	Vorbereitungen
The Code of Conduct aims to reduce the challenges faced in particular by small investors when doing business cross-border and to establish quick and standardised procedures for refunding withholding tax where appropriate.	The Code of Conduct aims to establish quick and standardised procedures for refunding withholding tax where appropriate.	Der Verhaltenskodex zielt darauf ab, schnelle und standardisierte Verfahren für die Zurücklegung der Quellensteuer einzuführen.	Der Verhaltenskodex zielt darauf ab, schnelle und standardisierte Verfahren für die Erstattung der Quellensteuer einzuführen.	Zurücklegung	Erstattung
The files are prepared in such a way that individual entities cannot be identified;	The files are prepared in such a way that individual entities cannot be identified.	Die Dateien werden so bearbeitet, dass einzelne Unternehmen nicht identifiziert werden können.	Die Dateien werden so erstellt, dass einzelne Einheiten nicht identifiziert werden können.	bearbeitet	erstellt
In the period 2012-2015, the total number of reported stations in fresh waters increased at EU level by around 23% compared to 2008–2011, reaching 33 042 stations.	In the period 2012-2015, the total number of reported stations in fresh waters increased at EU level by around 23% compared to 2008–2011, reaching 33 042 stations.	Im Vergleich zu 2008–2011 stieg die Gesamtzahl der gemeldeten Frischwasser-Messstellen im Zeitraum 2012-2015 EU-weit um etwa 23 % auf 33 042 Stationen an.	Im Vergleich zu 2008–2011 stieg die Gesamtzahl der gemeldeten Süßwasser-Messstellen im Zeitraum 2012-2015 EU-weit um etwa 23 % auf 33 042 Stationen an.	Frischwasser	Süßwasser
To ensure a smooth transition to his successor in the Secretariat-General, Alexander Italianer will continue serving President Juncker for another month as Hors Classe Adviser until 31 March.	To ensure a smooth transition to his successor in the Secretariat-General, Alexander Italianer will continue serving President Juncker for another month as Hors Classe Adviser.	Alexander Italiener wird Präsident Juncker für einen weiteren Monat als Sonderberater beliefern, um einen reibungslosen Übergang für seinen Nachfolger im Generalsekretariat zu gewährleisten.	Alexander Italiener wird Präsident Juncker für einen weiteren Monat als Sonderberater unterstützen, um einen reibungslosen Übergang für seinen Nachfolger im Generalsekretariat zu gewährleisten.	beliefern	unterstützen
I truly appreciated working with such an experienced and knowledgeable Secretary-General and I want to thank him for his skillful steer of our administration, as well as for having agreed to stay on for another month to ensure a smooth transition.	I want to thank him for having agreed to stay on for another month to ensure a smooth transition.	Ich möchte ihm für seine Bereitschaft danken, sich einen weiteren Monat im Amt aufzuhalten, um einen reibungslosen Übergang zu gewährleisten.	Ich möchte ihm für seine Bereitschaft danken, einen weiteren Monat im Amt zu bleiben, um einen reibungslosen Übergang zu gewährleisten.	aufzuhalten	bleiben
Withholding taxes are paid at source when certain income is passed on to a recipient, as opposed to being paid by the recipients themselves.	Withholding taxes are paid at source when income is passed on, as opposed to being paid by the recipients themselves.	Quellensteuern werden einbehalten, wenn Einkünfte weitergegeben werden; die Steuern werden also nicht vom Empfänger selbst entrichtet.	Quellensteuern werden einbehalten, wenn Erträge weitergegeben werden; die Steuern werden also nicht vom Empfänger selbst entrichtet.	Einkünfte	Erträge
You hire a driver to transport your goods to another EU country.	You hire a driver to transport your goods to another EU country.	Sie mieten einen Fahrer für die Beförderung Ihrer Waren in ein anderes EU-Land.	Sie beauftragen einen Fahrer mit der Beförderung Ihrer Waren in ein anderes EU-Land.	mieten	beauftragen
How would you rate the quality and usefulness of the advice/information obtained?	How would you rate the quality and usefulness of the advice / information obtained?	Wie bewerten Sie die Qualität und den Nutzen der Ratschläge / Information?	Wie bewerten Sie die Qualität und Nützlichkeit der Beratung / Information?	Ratschläge	Beratung
Are you the holder of any of the following authorizations for customs simplifications?	Please answer the following question: Are you the holder of any of the following authorizations for customs simplifications?	Bitte beantworten Sie die folgende Frage: Besitzen Sie den Inhaber einer der folgenden Bewilligungen für zollrechtliche Vereinfachungen?	Bitte beantworten Sie die foldende Frage: Sind Sie Inhaber einer der folgenden Bewilligungen für zollrechtliche Vereinfachungen?	besitzen	sind
As President of the Council, I will seek consensus and work for the unity of the Union.’	As President of the Council, I will seek consensus and work for the unity of the Union.	Als Vorsitzender des Rates werde ich mich um einen Konsens und um die Bemühungen der Union bemühen.	Als Vorsitzender des Rates werde ich mich um einen Konsens und um die Einheit der Union bemühen.	Bemühungen	Einheit
In addition, efforts are needed to ensure that the turnover of monitoring stations does not affect the accuracy of water quality trends.	The turnover of monitoring stations must not affect the accuracy of water quality trends.	Der Umsatz der Messstellen darf die Genauigkeit der gemessenen Wasserqualitätstrends nicht beeinträchtigen.	Die Erneuerung der Messstellen darf die Genauigkeit der gemessenen Wasserqualitätstrends nicht beeinträchtigen.	Umsatz	Erneuerung
How is my country doing?	How is my country doing?	Wie tut mein Land?	Wie geht es meinem Land?	tut	geht
During the course of one week, he drives for 56 hours and does 4 hours of vehicle maintenance - a total of 60 hours.	During the course of one week, he drives for 56 hours and does 4 hours of vehicle maintenance - a total of 60 hours.	Während einer Woche fahren er 56 Stunden und verwendet 4 Stunden auf die Fahrzeuginstandhaltung.	Während einer Woche fährt er 56 Stunden und verwendet 4 Stunden auf die Fahrzeuginstandhaltung.	fahren	fährt
Today’s package on Completing the Economic and Monetary Union is part of President Juncker’s broader Roadmap for a more United, Stronger and more Democratic Union as well as the resulting Leaders’ Agenda on the road to Sibiu, presented by the President of the European Council, Donald Tusk.	The Leaders’ Agenda on the road to Sibiu was presented by the President of the European Council, Donald Tusk.	Die Agenda der Staats- und Regierungschefs auf der Straße nach Sibiu wurde vom Präsidenten des Europäischen Rates, Donald Tusk, vorgestellt.	Die Agenda der Staats- und Regierungschefs auf dem Weg nach Sibiu wurde vom Präsidenten des Europäischen Rates, Donald Tusk, vorgestellt.	Straße	Weg
The complete set of information was only available to the Commission in October 2017.	The complete set of information was only available to the Commission in October 2017.	Die Kommission verfügte nur im Oktober 2017 über einen vollständigen Datensatz.	Die Kommission verfügte erst im Oktober 2017 über einen vollständigen Datensatz.	nur	erst
Single Market: It makes everyday life easier for people and businesses, and fuels jobs and growth.	Single Market: It makes everyday life easier for people and businesses, and fuels jobs and growth.	Der Binnenmarkt: Sie erleichtert Menschen und Unternehmen den Alltag und kurbelt Beschäftigung und Wachstum an.	Der Binnenmarkt: Er erleichtert Menschen und Unternehmen den Alltag und kurbelt Beschäftigung und Wachstum an.	sie	er
He has served five Commission Presidents, including in the Cabinets of Presidents Jacques Santer and José Manuel Barroso, where he was Deputy Head of Cabinet.	He has served five Commission Presidents, including in the Cabinets of Presidents Jacques Santer and José Manuel Barroso.	Er hat fünf Kommissionspräsidenten ernannt, u. a. in den Kabinetten der Präsidenten Jacques Santer und José Manuel Barroso.	Er diente unter fünf Kommissionspräsidenten, u. a. in den Kabinetten der Präsidenten Jacques Santer und José Manuel Barroso.	ernannt	diente
Breaks during the working day	There have to be breaks during the working day.	Es muss Brüche während des Arbeitstages geben.	Es muss Pausen während des Arbeitstags geben.	Brüche	Pausen

## Sheet: Reg
Reg: Original	ST2	ERR	CORR	Critical_word_err	Critical_word_corr
Are your customs declarations lodged in more than one Member State?	Are your customs declarations lodged and processed in more than one Member State?	Werden Ihre Zollanmeldungen in mehr als einem Mitgliedstaat abgegeben und bearbeitet?	Werden Ihre Zollanmeldungen in mehr als einem Mitgliedstaat eingereicht und bearbeitet?	abgegeben	eingereicht
Such levies are an important tool for EU Member States to ensure that taxes are being applied appropriately on cross-border transactions.	Such levies are an important tool to ensure that taxes are being applied appropriately on cross-border transactions.	Die Einbehaltung solcher Abgaben ist ein wichtiges Instrument, um sicherzustellen, dass die Steuern ordnungsgemäß angewandt werden.	Die Einbehaltung solcher Abgaben ist ein wichtiges Instrument, um sicherzustellen, dass Steuern ordnungsgemäß erhoben werden.	angewandt	erhoben
Monitoring greenhouse gas (GHG) emissions is at the heart of efforts to tackle climate change.	Monitoring greenhouse gas (GHG) emissions is at the heart of efforts to tackle climate change.	Die Überwachung der Treibhausgasemissionen steht im Mittelpunkt der Anstrengungen zur Bekämpfung des Klimawandels.	Die Überwachung der Treibhausgasemissionen steht im Mittelpunkt der Bemühungen zur Bekämpfung des Klimawandels.	Anstrengungen	Bemühungen
Eurostat also publishes air emissions accounts, which are in line with the System of Environmental-Economic Accounting (SEEA).	Eurostat also publishes air emissions accounts, which are in line with the System of Environmental-Economic Accounting (SEEA).	Eurostat veröffentlicht außerdem Luftemissionsrechnungen nach dem System of Environmental Economic Accounting (SEEA).	Eurostat veröffentlicht zudem Luftemissionsrechnungen nach dem System of Environmental Economic Accounting (SEEA).	außerdem	zudem
These impacts have subsequent wide-ranging effects on ecosystems, the economy, society and human health.	These impacts have subsequent wide-ranging effects on ecosystems, the economy, society and human health.	Diese Auswirkungen haben weitreichende Auswirkungen auf die Ökosysteme, die Wirtschaft, Gesellschaft und die menschliche Gesundheit.	Diese Auswirkungen haben weitreichende Folgen für Ökosysteme, Wirtschaft, Gesellschaft und die menschliche Gesundheit.	Auswirkungen	Folgen
ECHA hosts the world's largest database on chemicals and enables easy online access to chemical safety data.	ECHA hosts the world's largest database on chemicals and enables easy online access to chemical safety data.	Die ECHA beherbergt die weltweit größte Datenbank über Chemikalien und ermöglicht den einfachen Online-Zugriff auf Daten zur Sicherheit von Chemikalien.	Die ECHA unterhält die weltweit größte Datenbank über Chemikalien und ermöglicht den einfachen Online-Zugriff auf Daten zur Sicherheit von Chemikalien.	beherbergt	unterhält
Uncertainty about future drone rules hinders investment decisions	Uncertainty about future drone rules hinders investment decisions.	Unsicherheiten in Bezug auf künftige Drohnenvorschriften behindern die Investitionsbereitschaft.	Unsicherheiten in Bezug auf künftige Drohnenvorschriften belasten die Investitionsbereitschaft.	behindern	belasten
Are you familiar with the EU legislation in the field of customs valuation (via Union Customs Code legal package sources, EUR-LEX, Official Journal?	Are you familiar with the EU legislation in the field of customs valuation (via EUR-LEX, Official Journal)?	Sind Ihnen die EU-Rechtsvorschriften im Bereich der Zollwertermittlung bekannt (über EUR-Lex, Amtsblatt)?	Sind Sie mit den EU-Rechtsvorschriften zur Zollwertermittlung vertraut (über EUR-Lex, Amtsblatt)?	bekannt	vertraut
While a very important tool for protecting public finances, withholding taxes can lead to a disproportionate burden for individuals and companies when it comes to seeking tax relief.	While a very important tool, withholding taxes can lead to a disproportionate burden for individuals and companies when it comes to seeking tax relief.	Quellensteuern sind unverzichtbar, können aber für Einzelpersonen und Unternehmen, die einen Steuerabzug vornehmen wollen, zu einer unverhältnismäßigen Belastung führen.	Quellensteuern sind unverzichtbar, können aber für Einzelpersonen und Unternehmen, die einen Steuerabzug vornehmen wollen, zu unverhältnismäßigem Aufwand führen.	Belastung	Aufwand
However, as stated above the criteria used by Member States for designation may include other parameters than the average annual concentration.	However, as stated above the criteria for designation may include other parameters than the average annual concentration.	Wie bereits dargelegt, können Ausweisungskriterien jedoch auch andere Parameter als die mittlere Jahreskonzentration umfassen.	Wie bereits erwähnt, können Ausweisungskriterien jedoch auch andere Parameter als die mittlere Jahreskonzentration umfassen.	dargelegt	erwähnt
If your staff work between 6 and 9 hours, they must take a break of at least 30 minutes.	The first break must be at least 3 hours, the second at least 9 hours.	Die erste Pause muss mindestens drei Stunden umfassen, die zweite mindestens neun.	Die erste Pause muss mindestens drei Stunden dauern, die zweite mindestens neun.	umfassen	dauern
This will be an important part of the Juncker Commission's legacy to ensure that the digital single market translates into tangible benefits for citizens.	This will be an important part of the Juncker Commission's legacy to ensure that the digital single market translates into tangible benefits for citizens.	Dies wird ein wichtiger Teil des Erbes der Juncker-Kommission sein, um sicherzustellen, dass der digitale Binnenmarkt greifbare Vorteile für die Bürger bringt.	Dies wird ein wichtiger Teil des Vermächtnis der Juncker-Kommission sein, um sicherzustellen, dass der digitale Binnenmarkt greifbare Vorteile für die Bürger bringt.	Erbes	Vermächtnis
The links below provide an overview, without aiming to be exhaustive.	Without aiming to be exhaustive, the links below provide an overview.	Die nachstehenden Links liefern einen Überblick, es handelt sich jedoch nicht um eine erschöpfende Aufzählung.	Die nachstehenden Links liefern einen Überblick, es handelt sich jedoch nicht um eine vollständige Aufzählung.	erschöpfende	vollständige
The higher densities were found in the Netherlands (3.57), Malta (2.99) and Belgium (2.68) while the lowest were located in Bulgaria (0.21), Latvia (0.26) and Lithuania (0.29).	The higher densities were found in the Netherlands, Malta and Belgium while the lowest were located in Bulgaria, Latvia and Lithuania.	Die höchsten Besatzdichten wurden in den Niederlanden, Malta und Belgien festgestellt, die niedrigsten in Bulgarien, Lettland und Litauen.	Die höchsten Besatzdichten wurden in den Niederlanden, Malta und Belgien verzeichnet, die niedrigsten in Bulgarien, Lettland und Litauen.	festgestellt	verzeichnet
Maastricht Treaty sets about to create an Economic and Monetary Union with a single currency to boost the Single Market.	Maastricht Treaty sets about to create an Economic and Monetary Union with a single currency to boost the Single Market.	Ziel des Vertrags von Maastricht ist die Schaffung einer Wirtschafts- und Währungsunion mit einer einheitlichen Währung zur Förderung des Binnenmarkts.	Ziel des Vertrags von Maastricht ist die Schaffung einer Wirtschafts- und Währungsunion mit einer einheitlichen Währung zur Ankurbelung des Binnenmarkts.	Förderung	Ankurbelung
Together, Europe can be strong.	But I am confident that, together, Europe can be strong.	Ich bin jedoch zuversichtlich: Gemeinsam kann Europa stark sein.	Ich bin jedoch zuversichtlich: Geeint kann Europa stark sein.	gemeinsam	geeint
Among the drivers of these emissions are the burning of fossil fuels, industrial processes, livestock farming, and waste treatment.	Among the drivers of these emissions are the burning of fossil fuels, industrial processes, livestock farming, and waste treatment.	Emissionen werden unter anderem durch die Verbrennung fossiler Brennstoffe, industrielle Prozesse, Tierhaltung und Abfallbehandlung ausgelöst.	Emissionen werden unter anderem durch die Verbrennung fossiler Brennstoffe, industrielle Verfahren, Tierhaltung und Abfallbehandlung ausgelöst.	Prozesse	Verfahren
Action at European level will undoubtedly have undeniable added value.	It is undoubtedly the case that action at European level will have undeniable added value.	Ein Handeln auf europäischer Ebene wird zweifelsohne einen deutlichen Mehrwert bringen.	Ein Vorgehen auf europäischer Ebene wird zweifelsohne einen deutlichen Mehrwert bringen.	Handeln	Vorgehen
The Single Market offering free movement of goods, service, people and capital is one of the original core objectives of the European Economic Community, but is difficult to implement in practice.	The Single Market offers free movement of goods, service, people and capital is one of the original core objectives of the European Economic Community.	Der Binnenmarkt, der den freien Waren-, Dienstleistungs-, Personen- und Kapitalverkehr ermöglicht, ist eines der ursprünglichen Hauptziele der Europäischen Wirtschaftsgemeinschaft	Der Binnenmarkt, der den freien Waren-, Dienstleistungs-, Personen- und Kapitalverkehr ermöglicht, ist eines der ursprünglichen Kernziele der Europäischen Wirtschaftsgemeinschaft	Hauptziele	Kernziele
New figures on sport and physical activity confirms high levels of inactivity in the EU	New figures on sport and physical activity confirms high levels of inactivity in the EU	Neue Zahlen zu Sport und körperlicher Betätigung bestätigen ein hohes Maß an Inaktivität in der EU	Neue Zahlen zu Sport und körperlicher Betätigung bestätigen hohes Maß an Bewegungsmangel in der EU	Inaktivität	Bewegungsmangel
Boost the services economy	The Single Market should boost the services economy and improve the free flow of safe products.	Der Binnenmarkt soll die Dienstleistungswirtschaft stärken und den freien Verkehr sicherer Produkte verbessern.	Der Binnenmarkt soll die Dienstleistungswirtschaft ankurbeln und den freien Verkehr sicherer Produkte verbessern.	stärken	ankurbeln
This is why I want Martin Selmayr as the new Secretary-General to steer the talented and hard-working administration of our institution, and Clara Martinez Alberola to lead my personal team.	This is why I want Clara Martinez Alberola to lead my personal team, and Martin Selmayr as the new Secretary-General.	Deshalb möchte ich, dass Clara Martinez Alberola mein persönliches Team leitet und Martin Selmayr neuer Generalsekretär wird.	Deshalb möchte ich, dass Clara Martinez Alberola mein persönliches Team lenkt und Martin Selmayr neuer Generalsekretär wird.	leitet	lenkt
Every five years, at the beginning of a new Commission term, the president of the Commission also determines the political priorities for its upcoming term of office.	Every five years, the president of the Commission also determines the political priorities for its upcoming term of office.	Alle fünf Jahre legt der Präsident der Kommission die politischen Prioritäten für die nächste Amtszeit fest.	Alle fünf Jahre legt der Präsident der Kommission die politischen Prioritäten für die bevorstehende Amtszeit fest.	nächste	bevorstehende
These estimates are published in a news release only and are not available in a dataset.	These estimates are published in a news release only and are not available in a dataset.	Diese Schätzungen werden nur in einer Pressemitteilung veröffentlicht und sind nicht in einem Datensatz enthalten.	Diese Schätzungen werden ausschließlich in einer Pressemitteilung veröffentlicht und sind nicht in einem Datensatz enthalten.	nur	ausschließlich
The Commission is now counting on the European Parliament and the Council to complete work on all Single Market proposals so citizens and companies in Europe can soon make the most of the opportunities of the Single Market.	Citizens and companies in Europe can soon make the most of the opportunities of the Single Market.	Die Bürgerinnen und Bürger sowie die Unternehmen in Europa können die Chancen des Binnenmarktes bald optimal nutzen.	Die Bürgerinnen und Bürger sowie die Unternehmen in Europa können die Möglichkeiten des Binnenmarktes bald optimal nutzen.	Chancen	Möglichkeiten
The average sampling frequency is nearly twice a year, and varies between less than once a year in Denmark, Latvia, Poland and Sweden to around five times a year in Belgium and Croatia.	The average sampling frequency is nearly twice a year, and varies between less than once to around five times a year.	Proben werden im Schnitt fast zweimal jährlich gezogen; der Häufigkeitwert schwankt zwischen weniger als einmal und etwa fünf Mal jährlich.	Proben werden im Schnitt fast zweimal jährlich gezogen; der Häufigkeitwert schwankt zwischen weniger als einmal und ungefähr fünf Mal jährlich.	etwa	ungefähr
Basic rules on working time (EU Directive)	In the European Union, basic rules on working time apply.	In der Europäischen Union gelten grundlegende Arbeitszeitregelungen.	In der Europäischen Union gelten allgemeine Arbeitszeitregelungen.	grundlegende	allgemeine
The Single Market is the beating heart of the EU.	The Single Market is the beating heart of the EU.	Der Binnenmarkt ist das Rückgrat der EU.	Der Binnenmarkt ist das Herzstück der EU.	Rückgrat	Herzstück
For example, if your staff work 10 consecutive days, you must give them 10 consecutive rest days.	For example, if your staff work 10 consecutive days, you must give them 10 consecutive rest days.	Wenn Ihr Personal beispielsweise 10 Tage am Stück arbeitet, müssen Sie 10 aufeinanderfolgende Ruhetage gewähren.	Wenn Ihre Beschäftigten beispielsweise 10 Tage am Stück arbeiten, müssen Sie ihnen 10 aufeinanderfolgende Ruhetage gewähren.	Personal	Beschäftigte
Climate change as a result of human activities is a major threat to society due to the wide-ranging impacts on ecosystems, the economy, human health and wellbeing.	Due to the wide-ranging impacts, climate change as a result of human activities is a major threat to society.	Der Klimawandel als Folge menschlicher Tätigkeiten stellt aufgrund der weitreichenden Folgen eine große Bedrohung für die Gesellschaft dar.	Der Klimawandel als Folge menschlicher Aktivitäten stellt aufgrund der weitreichenden Folgen eine große Bedrohung für die Gesellschaft dar.	Tätigkeiten	Aktivitäten
However, the information reported shows that, at Member States level, there are still areas with potential water pollution that are not included in any NVZ.	However, the information reported shows that there are still areas with potential water pollution.	Aus den übermittelten Informationen geht jedoch hervor, dass es nach wie vor Gebiete mit potenziell verunreinigungsgefährdeten Gewässern gibt.	Aus den mitgeteilten Informationen geht jedoch hervor, dass es nach wie vor Gebiete mit potenziell verunreinigungsgefährdeten Gewässern gibt.	übermittelten	mitgeteilten
Since its set up in 2007, the European Chemicals Agency (ECHA) has a key role in the implementation of all the REACH processes.	Since its set up in 2007, the European Chemicals Agency (ECHA) has a key role in the implementation of all the REACH processes.	Seit ihrer Gründung im Jahr 2007 spielt die Europäische Chemikalienagentur (ECHA) eine Schlüsselrolle bei der Umsetzung aller REACH-Verfahren.	Seit ihrer Gründung im Jahr 2007 spielt die Europäische Chemikalienagentur (ECHA) eine Schlüsselrolle bei der Durchführung aller REACH-Verfahren.	Umsetzung	Durchführung
We have to deal with the consequences while trying to counter the causes of climate change.	We have to deal with the consequences while trying to counter the causes of climate change.	Wir müssen mit den Folgen umgehen und gleichzeitig versuchen, die Ursachen des Klimawandels zu bekämpfen.	Wir müssen mit den Folgen umgehen und gleichzeitig versuchen, die Auslöser des Klimawandels zu bekämpfen.	Ursachen	Auslöser
Commission initiatives for new policies have to be agreed on internally according to a set procedure.	Commission initiatives for new policies have to be agreed on internally according to a set procedure.	Initiativen der Kommission für neue politische Maßnahmen müssen nach einem festgelegten Verfahren intern vereinbart werden.	Initiativen der Kommission für neue politische Maßnahmen müssen nach einem festgelegten Verfahren intern angenommen werden.	vereinbart	angenommen
It is through such agreements that we can offer a better future to our citizens in Europe not the day after tomorrow, but in the very near future.	It is through such agreements that we can offer a better future to our citizens in Europe not the day after tomorrow, but in the very near future.	Durch Vereinbarungen wie diese können wir unseren Bürgerinnen und Bürgern eine bessere Zukunft sichern, und zwar nicht irgendwann in weiter Ferne, sondern schon morgen.	Durch Einigungen wie diese können wir unseren Bürgerinnen und Bürgern eine bessere Zukunft sichern, und zwar nicht irgendwann in weiter Ferne, sondern schon morgen.	Vereinbarungen	Einigungen
The highest relative reductions in density took place in Greece (-18.9%), Malta (-17.9%) and Denmark (-14.4%) while the highest increases happened in Austria (+7.2%), Ireland (+4.5%), Finland (+3.7%) and Germany (+3.5%).	The highest relative reductions in livestock density took place in Greece (-18.9%), Malta (-17.9%) and Denmark (-14.4%).	Die stärkste relative Verringerung der Besatzdichte wurde aus Griechenland (-18,9 %), Malta (-17,9 %) und Dänemark (-14,4 %) gemeldet.	Der stärkste relative Rückgang an Besatzdichte wurde aus Griechenland (-18,9 %), Malta (-17,9 %) und Dänemark (-14,4 %) gemeldet.	Verringerung	Rückgang
For example, statistics on agricultural production, waste generation, and energy use can be used to measure emissions.	For example, statistics on waste generation, and energy use can be used to measure emissions.	Beispielsweise können Statistiken über die Abfallerzeugung und den Energieverbrauch zur Messung der Emissionen verwendet werden.	Beispielsweise können Statistiken über die Abfallerzeugung und die Energienutzung zur Messung der Emissionen herangezogen werden.	verwendet	herangezogen
The ways in which these application standards are calculated and conveyed to the farmers vary in the different Member States.	The ways in which application standards are calculated and conveyed to the farmers vary in the different Member States.	Wie Anwendungsnormen berechnet und an Landwirte weitergeleitet werden, ist in den einzelnen Mitgliedstaaten unterschiedlich.	Wie Anwendungsnormen berechnet und den Landwirten vermittelt werden, ist von Mitgliedstaat zu Mitgliedstaat unterschiedlich.	weitergeleitet	vermittelt
The data reported show uneven efforts being deployed in water monitoring by Member States as well as a high number of new stations with no trends across the EU.	The data reported show a high number of new stations with no trends across the EU.	Die übermittelten Daten zeigen, dass es eine große Zahl neuer Messstellen gibt, ohne dass ein EU-weiter Trend erkennbar wäre.	Die übermittelten Daten zeigen, dass es eine große Menge neuer Messstellen gibt, ohne dass ein EU-weiter Trend erkennbar wäre.	Zahl	Menge
With their professionalism, expertise and strong team spirit, the Commission will be able to deliver its legislative agenda and prepare for the future."	With their professionalism, expertise and strong team spirit, the Commission will be able to prepare for the future.	Angesichts ihrer Professionalität, ihres Fachwissens und ihres starken Teamgeists wird die Kommission in der Lage sein, Europa auf die Zukunft vorzubereiten.	Angesichts ihrer Professionalität, ihres Fachwissens und ihres ausgeprägten Teamgeists wird die Kommission in der Lage sein, Europa auf die Zukunft vorzubereiten.	stark	ausgeprägten
Public microdata (also referred to as public use files, PUFs) for the European Union Labour Force Survey (EU-LFS) were created to enable interested parties to become familiar with microdata.	Public microdata were created to enable interested parties to become familiar with microdata.	Öffentliche Mikrodaten wurden geschaffen, damit sich interessierte Parteien damit vertraut machen können.	Öffentliche Mikrodaten wurden bereitgestellt, damit sich interessierte Parteien damit vertraut machen können.	geschaffen	bereitgestellt

## Sheet: Func
Func: Original	ST2	ERR	CORR	Critical_word_err	Critical_word_corr
A surplus represents a potential loss to the environment or risk of future loss via accumulation in the soil.	A nutrient surplus represents a potential loss to the environment.	Ein Nährstoffüberschuss entspricht einem potenziellen Verlust für die Umwelt.	Ein Nährstoffüberschuss entspricht einem potenziellen Verlust an die Umwelt.	für	an
Alexander Italianer, a Dutch national, joined the European Commission in 1985 starting in its Economic and Financial Affairs department.	Alexander Italianer joined the European Commission in 1985 starting in its Economic and Financial Affairs department.	Alexander Italianer begann 1985 mit der für Wirtschaft und Finanzen zuständigen Generaldirektion seinen Dienst in der Europäischen Kommission.	Alexander Italianer begann 1985 in der für Wirtschaft und Finanzen zuständigen Generaldirektion seinen Dienst in der Europäischen Kommission.	mit	in
Another challenge is to prevent nutrient losses to water and air through effective manure management.	Another challenge is to prevent nutrient losses to water and air through effective manure management.	Eine weitere Herausforderung ist die Vermeidung von Nährstoffverlusten in Wasser und Luft durch wirksame Dungbewirtschaftung.	Eine weitere Herausforderung ist die Vermeidung von Nährstoffverlusten an Wasser und Luft durch wirksame Dungbewirtschaftung.	in	an
As a result, and on the proposal of President Jean-Claude Juncker, the College has decided to appoint Martin Selmayr, the current Head of Cabinet of the President, as the new Secretary-General of the Commission.	The College has decided to appoint Martin Selmayr as the new Secretary-General of the Commission.	Das Kollegium hat beschlossen, Martin Selmayr als neuen Generalsekretär der Kommission zu ernennen.	Das Kollegium hat beschlossen, Martin Selmayr zum neuen Generalsekretär der Kommission zu ernennen.	als	zum
As of July 2017, eight infringement cases were open against seven Member States.	Eight infringement cases were open against seven Member States as of July 2017.	Acht Vertragsverletzungsverfahren gegen sieben Mitgliedstaaten waren im Juli 2017 anhängig.	Acht Vertragsverletzungsverfahren gegen sieben Mitgliedstaaten waren seit Juli 2017 anhängig.	im	seit
At the same time the situation is variable across the EU, with Member States where action programmes are yielding good results and Member States where further action to reduce and prevent pollution is needed.	Some Member States are yielding good results, while in others further action is needed to reduce and prevent pollution.	Einige Mitgliedstaaten erzielen gute Ergebnisse, während in anderen weitere Maßnahmen zur Verringerung und Vermeidung von Gewässerverunreinigung erforderlich sind.	Einigen Mitgliedstaaten erzielen gute Ergebnisse, während in anderen weitere Maßnahmen zur Verringerung und Vermeidung der Gewässerverunreinigung erforderlich sind.	von	der
Compared to the reporting period 2008-2011, there are positive developments, indeed the annual average nitrates concentrations is getting better in 31% of all freshwaters monitoring stations, of which 9% showed a strong improvement.	Compared to 2008-2011, there are positive developments, indeed the annual average nitrates concentrations is getting better.	Verglichen mit 2008-2011 sind positive Entwicklungen erkennbar, sodass die Jahresmittelwerte der Nitratkonzentrationen rückläufig sind.	Verglichen mit 2008-2011 sind positive Entwicklungen erkennbar, denn die Jahresmittelwerte der Nitratkonzentrationen sind rückläufig.	sodass	denn
Comparing water monitoring results from the period 2012–2015 with those for 2008–2011, water quality remained the same or improved in 74% of the stations.	Comparing water monitoring results, water quality remained the same or improved in 74% of the stations.	Beim Vergleich der Ergebnisse der Gewässerüberwachung blieb die Wasserqualität in 74 % aller Messstellen konstant oder verbesserte sich.	Beim Vergleich der Ergebnisse der Gewässerüberwachung blieb die Wasserqualität bei 74 % aller Messstellen konstant oder verbesserte sich.	in	bei
Comparison of Figure A with frequency diagram of annual average nitrate concentrations in groundwater in the reports from the Commission to the Council and the European Parliament and respective accompanying Commission Staff Working concerning the previous reporting periods may be hampered due to possible substantial differences in the number of the monitored stations.	A comparison may be hampered due to possible substantial differences in the number of the monitored stations.	Ein Vergleich wird durch mögliche wesentliche Unterschiede in der Zahl der überwachten Messstellen möglicherweise erschwert.	Ein Vergleich wird durch etwaige wesentliche Unterschiede in der Zahl der überwachten Messstellen möglicherweise erschwert.	mögliche	etwaige
For six of them, the submitted data regrettably showed a 100% proportion of eutrophic or hypertrophic waters.	Regrettably, for six Member States, the submitted data showed a 100% proportion of eutrophic or hypertrophic waters.	Bedauerlicherweise zeigten die vorgelegten Daten bei sechs Mitgliedstaaten einen 100 %igen Anteil an eutrophen oder hypertrophen Gewässern.	Bedauerlicherweise zeigten die vorgelegten Daten für sechs Mitgliedstaaten einen 100 %igen Anteil an eutrophen oder hypertrophen Gewässern.	bei	für
For transitional waters, data were submitted by only eight Member States (Ireland, Italy, Latvia, Lithuania, Malta, Poland, Romania and Spain) and two regions (Flanders and Northern Ireland).	For transitional waters, data were submitted by only eight Member States.	Für Übergangsgewässer wurden nur von acht Mitgliedstaaten Daten vorgelegt.	Für Übergangsgewässer haben nur acht Mitgliedstaaten Daten vorgelegt.	wurden	haben
However, the comparability of data between Member States is limited by differences in the monitoring networks and strategies.	However, the comparability of data between Member States is limited by differences in the monitoring networks and strategies.	Die Vergleichbarkeit der Daten zwischen den Mitgliedstaaten ist jedoch durch die Unterschiede in den Überwachungsnetzen und -strategien begrenzt.	Die Vergleichbarkeit der Daten zwischen den Mitgliedstaaten ist jedoch aufgrund der Unterschiede in den Überwachungsnetzen und -strategien begrenzt.	durch	aufgrund
In fact, the intensity of the monitoring (for instance, the density of monitoring networks and the frequency of sampling) strongly varies between Member States, and might not always be well adapted to the actual pressures.	And, in fact, the intensity of the monitoring strongly varies between Member States, and might not always be well adapted to the actual pressures.	Und so schwankt die Überwachungsintensität zwischen den Mitgliedstaaten stark.	Und tatsächlich schwankt die Überwachungsintensität zwischen den Mitgliedstaaten stark.	so	tatsächlich
In some Member States with the action programme applied throughout the whole territory, the main challenge is to adequately target the measures to different regional pressures and hotspots.	Some Member States apply the action programme throughout the whole territory.	Einige Mitgliedstaaten wenden das Aktionsprogramm auf ihrem gesamten Hoheitsgebiet an.	Einige Mitgliedstaaten wenden das Aktionsprogramm in ihrem gesamten Hoheitsgebiet an.	auf	in
In some Member States with the action programme applied throughout the whole territory, the main challenge is to adequately target the measures to different regional pressures and hotspots.	The main challenge in some Member States is to adequately target the measures to different regional pressures and hotspots.	Die größte Herausforderung in einigen Mitgliedstaaten besteht darin, die Maßnahmen optimal auf die verschiedenen regionalen Belastungen und Hotspots auszurichten.	Die größte Herausforderung für einige Mitgliedstaaten besteht darin, die Maßnahmen optimal auf die verschiedenen regionalen Belastungen und Hotspots auszurichten.	in	für
On the proposal of President Juncker, Martin Selmayr, who is the President’s current Head of Cabinet, has been appointed today as the European Commission’s new Secretary-General with effect of 1 March.	Martin Selmayr has been appointed today as the European Commission’s new Secretary-General on the proposal of President Juncker.	Martin Selmayr wurde zum Vorschlag von Präsident Juncker zum Generalsekretär der Europäischen Kommission ernannt.	Martin Selmayr wurde auf Vorschlag von Präsident Juncker zum Generalsekretär der Europäischen Kommission ernannt.	zum	auf
The EU-SILC public microdata are fully synthetic, they do not present the actual observations, but they were simulated using statistical modelling and the statistical distributions in the original data.	The public microdata do not present the actual observations, but they were simulated using statistical modelling.	Öffentlichen Mikrodaten geben nicht die tatsächlichen Beobachtungen vor, sondern wurden anhand statistischer Modellierung simuliert.	Öffentlichen Mikrodaten geben nicht die tatsächlichen Beobachtungen wieder, sondern wurden anhand statistischer Modellierung simuliert.	vor	wieder
The total area of nitrate vulnerable zones has been increasing since 2012.	The total area of nitrate vulnerable zones has been increasing since 2012.	Die Gesamtfläche von nitratgefährdeten Gebieten hat sich seit 2012 erhöht.	Die Gesamtfläche der nitratgefährdeten Gebiete hat sich seit 2012 erhöht.	von	der
Which approximate amount of import duties did you pay in 2016?	Which approximate amount of import duties did you pay in 2016?	Wie hoch war in etwa der Betrag der Einfuhrabgaben, die Sie 2016 entrichtet haben?	Wie hoch war in etwa der Betrag der Einfuhrabgaben, den Sie 2016 entrichtet haben?	die	den
